# Supplementary material
Source: MDPI journal article supplement (https://www.mdpi.com/2073-4441/15/20/3648)
Supplement: s1 [file s1]

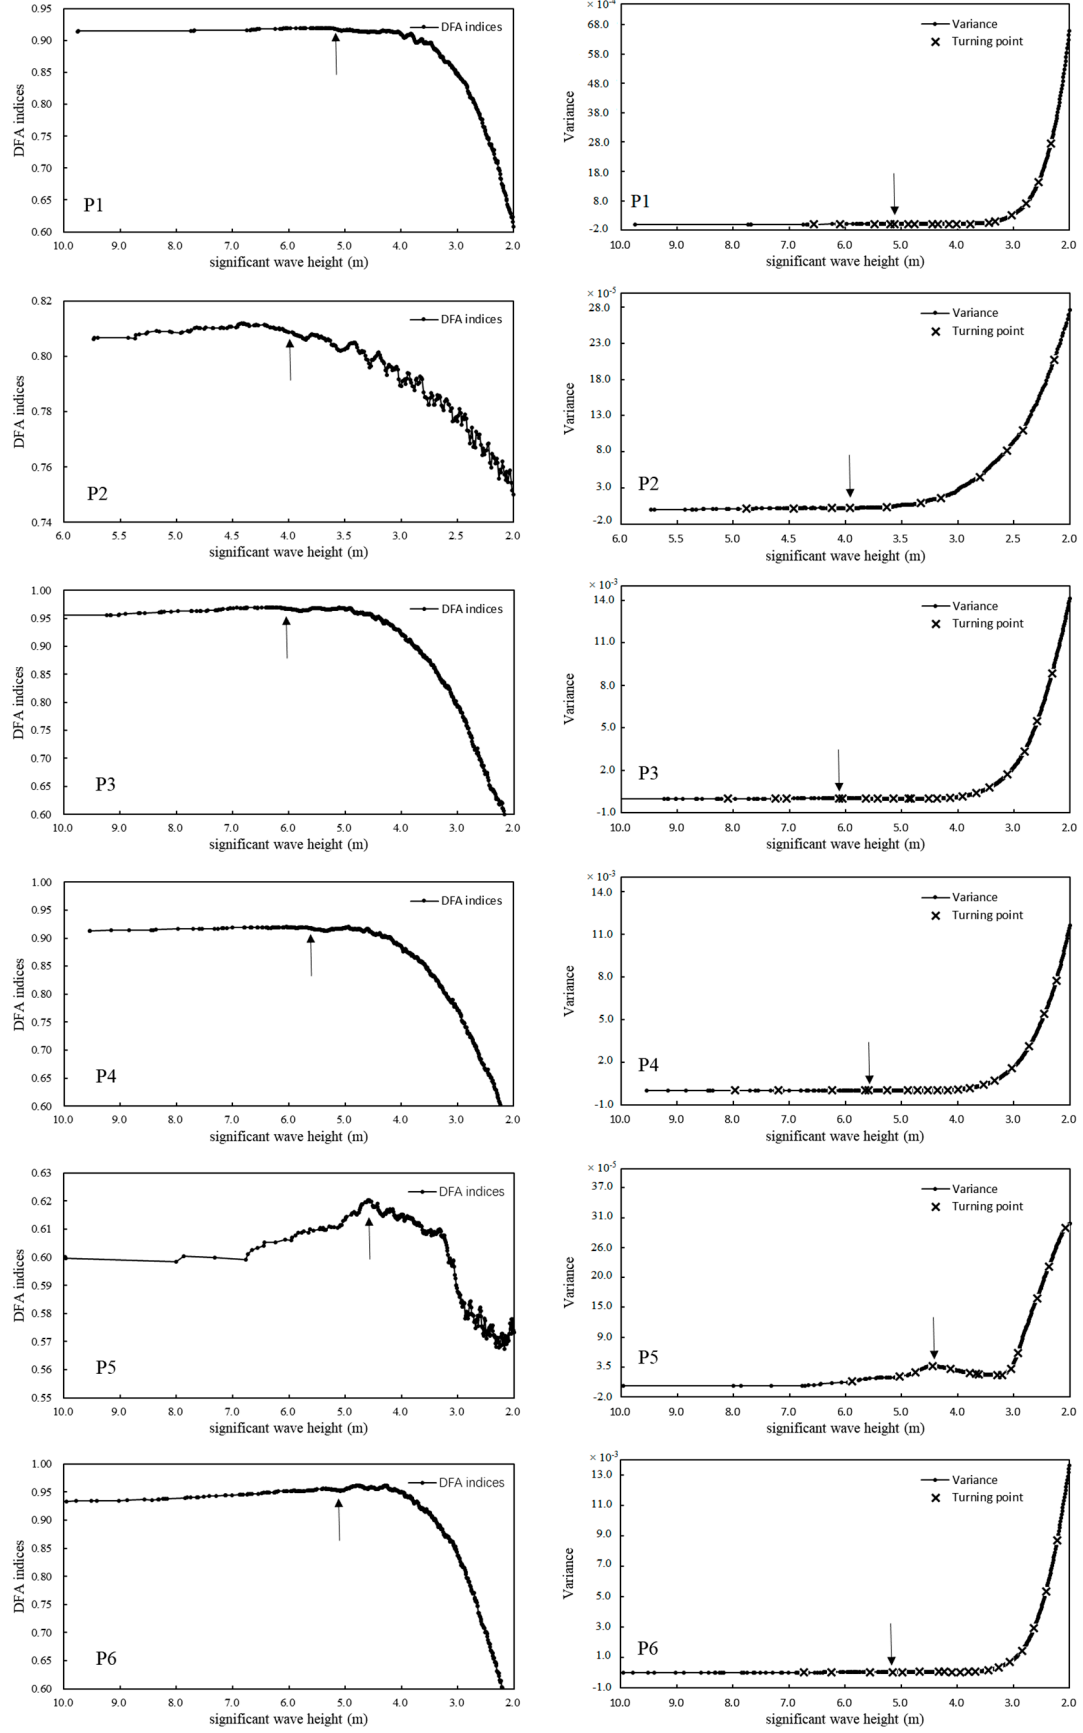

**Figure S1.** Determination of the extreme wave height threshold using the MF-DFA method.

**Table S1.** Significance test of turning point.

| Turning Point (P1) | n   | $\chi^2$ | $\chi^2_{(a/2)}$ | $\chi^2_{(1-a/2)}$ | Significance Test |
|--------------------|-----|----------|------------------|--------------------|-------------------|
| 5.19               | 52  | 50.03    | 64.3             | 38.56              | No                |
| 5.12               | 56  | 71.14    | 68.8             | 42.06              | Yes               |
| 4.87               | 74  | 90.6     | 88.85            | 58.01              | Yes               |
| 4.76               | 83  | 140.27   | 98.78            | 66.08              | Yes               |
| 4.44               | 112 | 121.82   | 130.47           | 92.38              | No                |
| 4.35               | 121 | 113.72   | 140.23           | 100.62             | No                |

  

| Turning Point (P2) | n   | $\chi^2$ | $\chi^2_{(a/2)}$ | $\chi^2_{(1-a/2)}$ | Significance Test |
|--------------------|-----|----------|------------------|--------------------|-------------------|
| 4.46               | 36  | 43.47    | 46.06            | 24.80              | No                |
| 4.12               | 59  | 52.63    | 72.16            | 44.70              | No                |
| 3.96               | 70  | 120.33   | 84.42            | 54.44              | Yes               |
| 3.63               | 101 | 274.09   | 118.50           | 82.36              | Yes               |
| 3.33               | 130 | 240.74   | 149.97           | 108.89             | Yes               |
| 3.15               | 148 | 417.68   | 169.36           | 125.50             | Yes               |

  

| Turning Point (P3) | n   | $\chi^2$ | $\chi^2_{(a/2)}$ | $\chi^2_{(1-a/2)}$ | Significance Test |
|--------------------|-----|----------|------------------|--------------------|-------------------|
| 6.11               | 67  | 64.96    | 81.09            | 51.77              | No                |
| 6.06               | 70  | 51.06    | 84.42            | 54.44              | Yes               |
| 5.63               | 99  | 90.49    | 116.32           | 80.54              | No                |
| 5.43               | 117 | 97.53    | 135.90           | 96.96              | No                |
| 5.14               | 143 | 129.44   | 163.98           | 120.88             | No                |
| 4.87               | 170 | 171.80   | 192.95           | 145.91             | No                |

  

| Turning Point (P4) | n   | $\chi^2$ | $\chi^2_{(a/2)}$ | $\chi^2_{(1-a/2)}$ | Significance Test |
|--------------------|-----|----------|------------------|--------------------|-------------------|
| 6.24               | 34  | 23.34    | 43.75            | 23.11              | No                |
| 5.65               | 68  | 63.69    | 82.20            | 52.66              | No                |
| 5.59               | 73  | 137.69   | 87.74            | 57.11              | Yes               |
| 5.25               | 100 | 81.63    | 117.41           | 81.45              | No                |
| 4.88               | 135 | 125.77   | 155.36           | 113.49             | No                |
| 6.24               | 34  | 23.34    | 43.75            | 23.11              | No                |

| Turning<br>Point (P5) | n   | $\chi^2$ | $\chi^2_{(a/2)}$ | $\chi^2_{(1-a/2)}$ | Significance<br>Test |
|-----------------------|-----|----------|------------------|--------------------|----------------------|
| 4.45                  | 64  | 48.83    | 77.75            | 49.11              | Yes                  |
| 4.13                  | 87  | 70.17    | 103.18           | 69.68              | No                   |
| 3.79                  | 117 | 108.15   | 135.90           | 96.96              | No                   |
| 3.68                  | 127 | 123.11   | 146.72           | 106.13             | No                   |
| 3.63                  | 132 | 121.61   | 152.12           | 110.73             | No                   |
| 3.29                  | 165 | 167.22   | 187.60           | 141.26             | No                   |

| Turning<br>Point (P6) | n   | $\chi^2$ | $\chi^2_{(a/2)}$ | $\chi^2_{(1-a/2)}$ | Significance<br>Test |
|-----------------------|-----|----------|------------------|--------------------|----------------------|
| 5.56                  | 68  | 71.50    | 82.20            | 52.66              | No                   |
| 5.15                  | 88  | 105.16   | 104.28           | 70.58              | Yes                  |
| 4.98                  | 103 | 114.90   | 120.68           | 84.18              | No                   |
| 4.67                  | 131 | 121.52   | 151.05           | 109.81             | No                   |
| 4.33                  | 165 | 166.61   | 187.60           | 141.26             | No                   |
| 4.23                  | 175 | 162.72   | 198.29           | 150.56             | No                   |

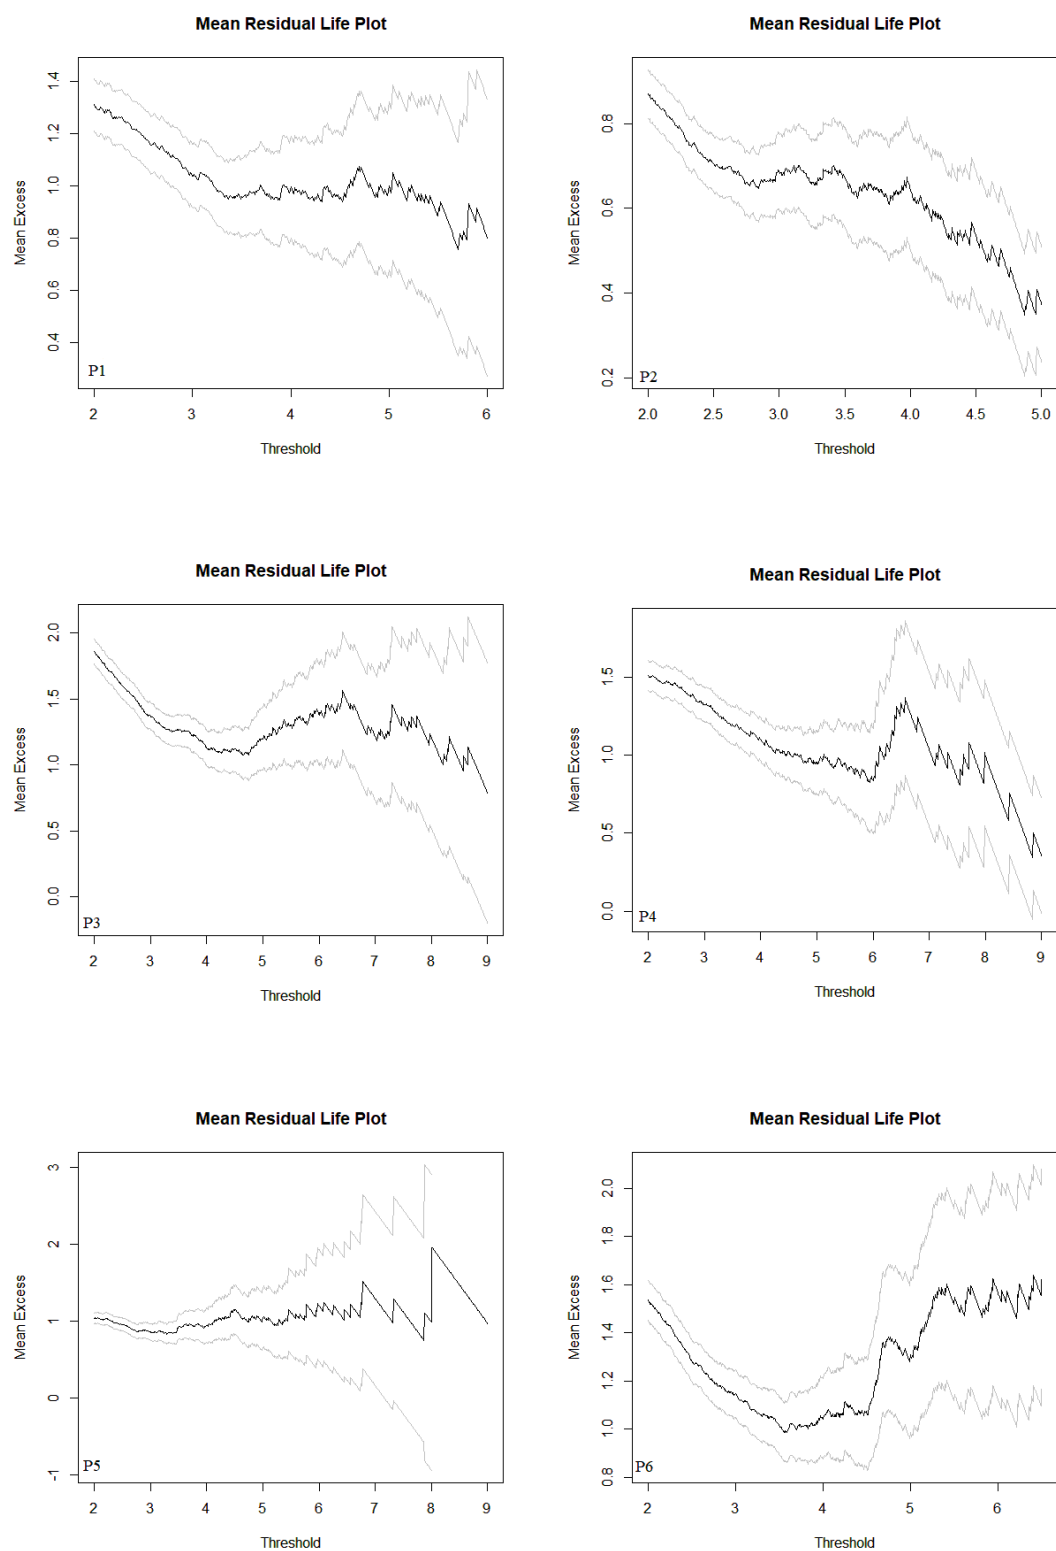

Figure S2. Mean residual life plots.

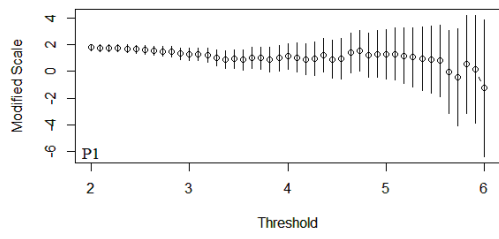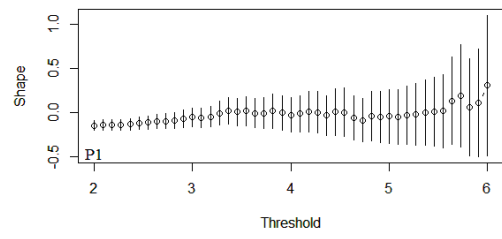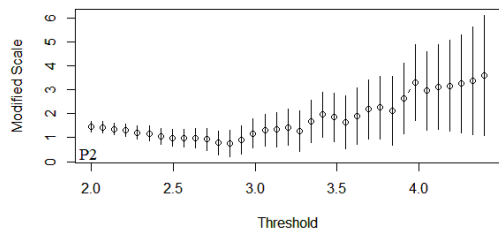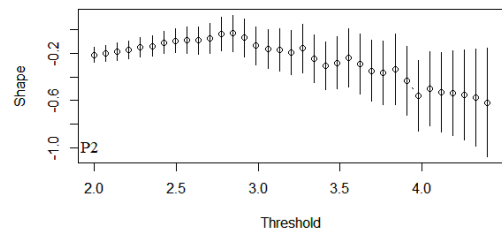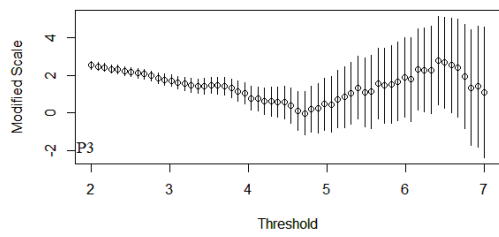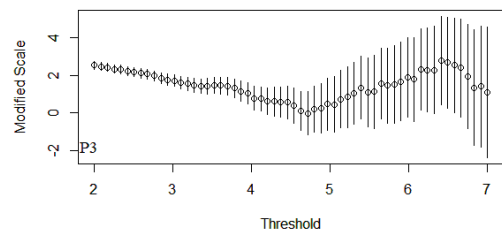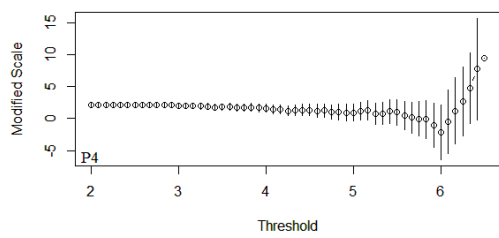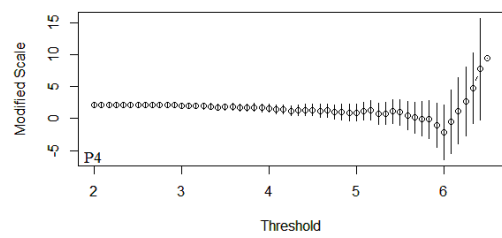

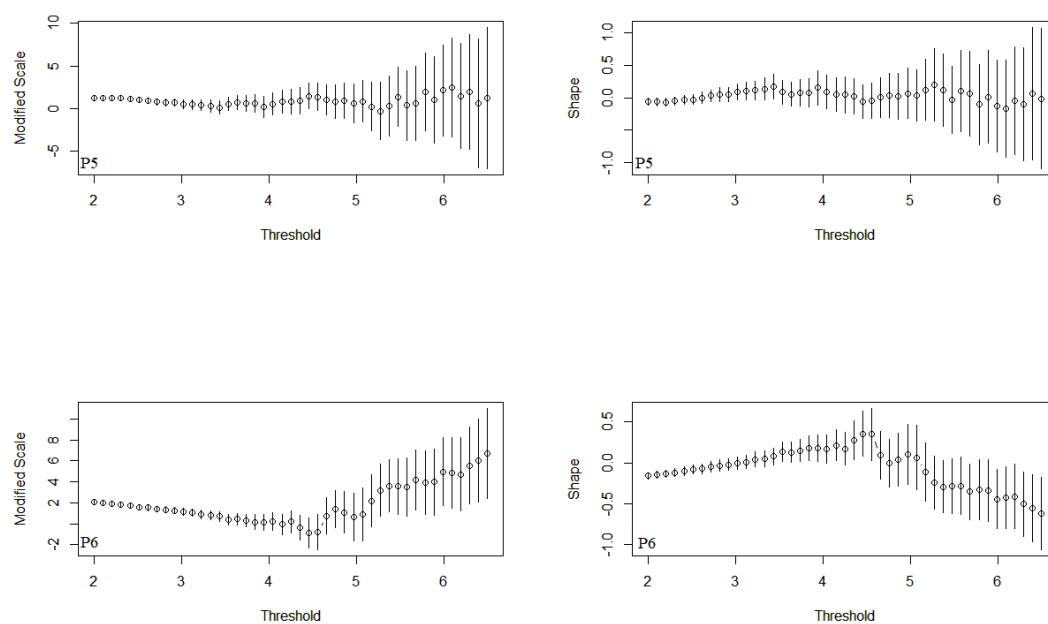

Figure S3. Parameter stability plots.
